1 **Proton pump inhibitors inhibit PHOSPHO1 activity and matrix mineralisation *in vitro***

2 Katherine A. Staines<sup>1</sup>, Katherine Myers<sup>2</sup>, Kirsty Little<sup>2</sup>, Stuart H. Ralston<sup>3</sup>, Colin  
3 Farquharson<sup>2</sup>

4

5 <sup>1</sup> School of Pharmacy and Biomolecular Sciences, University of Brighton, Brighton UK

6 <sup>2</sup> The Roslin Institute, The University of Edinburgh, Edinburgh, UK

7 <sup>3</sup> Centre for Genomic and Experimental Medicine, Institute of Genetics and Cancer,  
8 University of Edinburgh, Edinburgh, United Kingdom

9

10 *Corresponding author*

11 Katherine Ann Staines, University of Brighton, Lewes Road, Brighton BN2 4GJ

12 Email: [k.staines@brighton.ac.uk](mailto:k.staines@brighton.ac.uk) Tel: 01273 642 094

13 ORCID ID: 0000-0002-8492-9778

14

15

16

17

18

19

20

21

22

23

24 **Abstract**

25 Proton pump inhibitors (PPIs) have been associated with an increased risk of fragility  
26 fractures in pharmaco-epidemiological studies. The mechanism is unclear but it has been  
27 speculated that by neutralising gastric acid, they may reduce intestinal calcium absorption,  
28 causing secondary hyperparathyroidism and bone loss. Here we investigated that hypothesis  
29 that the skeletal effects of PPI might be mediated by inhibitory effects on the bone-specific  
30 phosphatase PHOSPHO1. We found that the all PPI tested potential inhibited the activity of  
31 PHOSPHO1 with IC50 ranging between 0.73 $\mu$ M for esomeprazole to 19.27 $\mu$ M for  
32 pantoprazole. In contrast, these PPIs did not inhibit TNAP activity. We also found that  
33 mineralisation of bone matrix in primary osteoblast cultures inhibited by several PPI in a  
34 concentration dependent manner. In contrast, the histamine-2 receptor antagonists (H2RA)  
35 nizatidine, famotidine, cimetidine and ranitidine had no inhibitory effects on PHOSPHO1  
36 activity. Our experiments shown for the first time that PPI inhibit PHOSPHO1 activity and  
37 matrix mineralisation *in vitro* revealing a potential mechanism by which these widely used  
38 drugs are associated with the risk of fractures.

39 **Key words:** PHOSPHO1, proton pump inhibitors, histamine-2 receptor antagonists,  
40 mineralisation, TNAP

41

42

43

44

45

46

47

## 48 **Introduction**

49 Proton pump inhibitors (PPIs) are amongst the most commonly prescribed drugs and are used  
50 in the treatment of gastroesophageal reflux disease (GORD), peptic ulcer disease and  
51 dyspepsia [1]. In the UK alone, more than 60 million PPI prescriptions were issued during  
52 2017 [2]. The safety records of PPI's are generally favourable but pharmaco-epidemiological  
53 evidence has consistently shown a positive association between PPI use and bone fractures.  
54 For example, large scale studies conducted in Denmark, UK and Canada all reported an  
55 increased risk of osteoporosis related fractures including fractures to the hip and spine with  
56 chronic PPI therapy [3–5].

57 The most commonly accepted explanation is that PPIs predispose to fractures by neutralising  
58 gastric acid. This in turn is thought to impair intestinal calcium absorption, secondary  
59 hyperparathyroidism and increased osteoclastic bone resorption with bone loss [6–8].  
60 However, in healthy subjects, short term treatment with the PPI omeprazole was not found to  
61 have inhibitory effects on calcium absorption [9, 10]. Furthermore, epidemiological studies  
62 with histamine 2 receptor antagonists (H2RAs), which also suppress gastric acid secretion,  
63 have not shown an association with fractures [3, 11–15]. Likewise, a recent meta-analysis  
64 reported that the use of PPIs, but not H2RAs, is associated with an increased risk of hip  
65 fracture [16]. These conflicting data suggest that PPI use may increase fracture incidence by a  
66 mechanism that distinct from effects on intestinal calcium absorption.

67 PHOSPHO1, a member of the haloacid dehalogenase superfamily, is a cytosolic phosphatase  
68 highly expressed by osteoblasts which is essential for bone mineralisation [17]. It liberates  
69 inorganic phosphate ( $P_i$ ) through the hydrolysis of phospholipid substrates within the matrix  
70 vesicle (MV) membrane [17–19]. Within this protected environment,  $P_i$  accumulates and  
71 chelates with  $Ca^{2+}$  which is enriched in MVs to form mineral crystals which subsequently

72 invade and mineralise the organic collagenous scaffold [17–22]. Deletion of PHOSPHO1 in  
73 mice results in bowed long bones and spontaneous greenstick fractures, decreased cortical  
74 BMD and accumulation of osteoid in trabecular bone [23]. Similarly, osteoblasts treated with  
75 a PHOSPHO1 specific inhibitor and cultures of *Phospho1* deficient primary osteoblast both  
76 revealed reduced matrix mineralising ability, whereas matrix mineralisation was increased by  
77 osteoblasts overexpressing PHOSPHO1 [24, 25]. A critical role for PHOSPHO1 in the  
78 mineralisation process was confirmed in a comparison of the bone phenotype of; *Alpl*<sup>-/-</sup> ;  
79 *Phospho1*<sup>-/-</sup> double knockout mice to that of *Alpl*<sup>-/-</sup> and *Phospho1*<sup>-/-</sup> mice. The skeleton of  
80 both single gene knockouts was impaired whereas the double ablation led to the complete  
81 absence of skeletal mineralisation and embryonic lethality. These experimental data are  
82 consistent with the notion that PHOSPHO1 and TNAP have independent, non-redundant  
83 roles during the mineralisation process [23].

84 We previously identified, through a screen of chemical libraries containing over 50,000  
85 compounds, the PPI, lansoprazole as a PHOSPHO1-specific inhibitor [18]. Indeed,  
86 lansoprazole non-competitively inhibited recombinant human PHOSPHO1 activity by over  
87 70% and caused a 57% inhibition of osteoblast MV calcification but had no effect on tissue  
88 non-specific alkaline phosphatase (TNAP) activity [18]. Furthermore, *in vivo* studies  
89 disclosed that lansoprazole administration to developing chick embryos completely inhibited  
90 mineralisation of all leg and wing long bones [26].

91 In view of the fact that PHOSPHO1 plays a critical role in bone mineralisation, we  
92 hypothesise that the association between PPI use and bone fractures is possibly due to their  
93 inhibitory effect on PHOSPHO1 activity. To address this hypothesis, we used *in vitro*  
94 approaches to evaluate the potential of commonly prescribed PPIs and H2RAs to inhibit both  
95 PHOSPHO1 enzyme activity and osteoblast matrix mineralisation.

## 96 **Materials and Methods**

97 *PPI and H2RAs*

98 The PPIs lansoprazole, omeprazole, pantoprazole and esomeprazole (Cayman Chemicals,  
99 Michigan, USA) were used at varying concentrations (0-100 $\mu$ M) in the phosphatase activity  
100 and *in vitro* mineralisation assays detailed below. Similarly, the H2RAs nizatidine,  
101 famotidine, cimetidine and ranitidine (Selleckchem, Munich, Germany) were also used at 0-  
102 100 $\mu$ M.

103 *Primary osteoblast isolation*

104 Primary calvarial osteoblasts were obtained from 4-day-old wild-type C57Bl/6 mice. All  
105 experimental protocols were approved by Roslin Institute's Animal Users Committee and the  
106 animals were maintained in accordance with UK Home Office guidelines for the care and use  
107 of laboratory animals. Primary osteoblasts were isolated by sequential enzyme digestion of  
108 excised calvarial bones using a four-step process as has previously been described [7,8] [1  
109 mg/ml collagenase type II in Hanks' balanced salt solution (HBSS) for 10 min; 1 mg/ml  
110 collagenase type II in HBSS for 30 min; 4 mM EDTA for 10 min; 1 mg/ml collagenase type  
111 II in HBSS for 30 min]. The first digest was discarded and the cells were re-suspended in  
112 growth medium consisting of  $\alpha$ -MEM (Invitrogen, Paisley, UK) supplemented with 10%  
113 (v/v) FBS and 1% gentamycin (Invitrogen). Osteoblasts were seeded at a density of  $1 \times 10^4$   
114 cells/cm<sup>2</sup> and grown to confluency at which point 2mM  $\beta$ -glycerophosphate and 50 $\mu$ g/ml  
115 ascorbic acid was added along with a PPI (0- 50 $\mu$ M) as described in results. Media was  
116 changed every 2-3 days for the duration of the 28-day experiments.

117 *Assessment of primary osteoblast matrix mineralisation*

118 After 28 days, primary cell cultures were fixed in 4% paraformaldehyde for 5 min at room  
119 temperature. Cell monolayers were stained with aqueous 2% (w/v) Alizarin red solution for 5  
120 min at room temperature. The bound stain was solubilised in 10% cetylpyridinium chloride

121 and the optical density of the resultant eluted solution measured by spectrophotometry at  
122 570nm.

### 123 *Phosphatase assays*

124 Recombinant human PHOSPHO1 (50ng) was generated as previously described [27] and  
125 incubated with varying concentrations of the aforementioned PPIs and H2RAs in  
126 experimental assay buffer (20mM Tris, 2mM MgCl<sub>2</sub> & 25µg/ml BSA) at 37°C for 15 mins.  
127 Using the BIOMOL<sup>®</sup> Green assay (Enzo, Exeter, UK), standards (0-2nM) and samples were  
128 then incubated with 2.5mM β-glycerol phosphate for 30min at 37°C with gentle agitation  
129 [27]. The reaction was stopped using 100µl BIOMOL<sup>®</sup> Green and after being left for 30min  
130 at room temperature, the absorbance was read using spectrophotometry at 630nm. For TNAP,  
131 2ng recombinant human TNAP (R&D Systems, Abington, UK), was incubated with varying  
132 concentrations of the aforementioned PPIs and H2RAs in experimental assay buffer (1M  
133 diethylamine hydrochloride, 1mM MgCl<sub>2</sub> and 20µM ZnCl<sub>2</sub>). Using the BIOMOL<sup>®</sup> Green  
134 assay, standards (0-2nM) and samples were then incubated with 0.5mM p-nitrophenyl  
135 phosphate (pNPP) for 30min at 37°C with gentle agitation. The reaction was stopped using  
136 100µl BIOMOL<sup>®</sup> Green and after being left for 30min at room temperature, the absorbance  
137 was read using spectrophotometry at 630nm.

### 138 *Statistical analysis*

139 Data are expressed as the mean ± standard error of the mean (S.E.M) of at least 3 replicates  
140 per experiment. Statistical analysis was performed by one-way analysis of variance  
141 (ANOVA). P<0.05 was considered to be significant and noted as \*; P values of <0.01 and  
142 <0.001 were noted as ‘\*\*’ and ‘\*\*\*’ respectively.

## 143 **Results**

144 *PPIs are potent inhibitors of PHOSPHO1 activity*

145 In accordance with our previous results, lansoprazole inhibited PHOSPHO1 activity ( $IC_{50} =$   
146  $2.767\mu M$ ; Fig. 1A). Similarly, here we show for the first time that the PPIs omeprazole ( $IC_{50}$   
147  $= 2.803\mu M$ ) and esomeprazole ( $IC_{50} = 0.726\mu M$ ) are potent inhibitors of PHOSPHO1 activity  
148 (Figs. 1B & C). Whilst pantoprazole also inhibited PHOSPHO1 activity, its  $IC_{50}$  was  
149  $19.27\mu M$ , suggesting that this PPI is the least potent PHOSPHO1 inhibitor tested (Fig. 1D).

#### 150 *PHOSPHO1 activity is not inhibited by H2RAs*

151 We next sought to examine whether PHOSPHO1 activity is similarly inhibited by four  
152 commonly prescribed H2RAs. At all concentrations tested, there was no inhibition of  
153 PHOSPHO1 activity upon addition of nizatidine (Fig. 2A), famotidine (Fig. 2B), cimetidine  
154 (Fig. 2C) and ranitidine (Fig. 2D).

#### 155 *PPIs and H2RAs have no effect on TNAP activity*

156 We next determined whether the aforementioned PPIs are able to inhibit TNAP activity. At  
157 all concentrations tested, lansoprazole, omeprazole, esomeprazole and pantoprazole did not  
158 inhibit TNAP activity (Figs. 3A – D). Similarly, there was no inhibition of TNAP activity by  
159 the H2RAs (Fig. 4A – D).

#### 160 *PPIs inhibit primary osteoblast matrix mineralisation*

161 To examine whether the inhibition of PHOSPHO1 by PPIs has an effect on matrix  
162 mineralisation, we cultured primary osteoblasts in the presence of different concentrations of  
163 lansoprazole, omeprazole, esomeprazole and pantoprazole. We found that whilst control  
164 cultures formed mineralised nodules after 28 days in culture, the addition of  $5\mu M$  and  $10\mu M$   
165 lansoprazole significantly decreased matrix mineralisation (Figs. 5A, B & C). Despite this,  
166 nodules were clearly visible throughout the cultures suggestive that the effects seen are  
167 directly on mineralisation rather than the differentiation of the cells (Fig. 5A). Similarly,  
168 omeprazole and esomeprazole significantly inhibited matrix mineralisation at concentration

169 of 10 $\mu$ M (Figs. 5A, B & C). In concordance with the higher IC<sub>50</sub> of pantoprazole, culture of  
170 primary osteoblasts with 5 $\mu$ M and 10 $\mu$ M pantoprazole was not sufficient to inhibit matrix  
171 mineralisation (Figs. 5A, B & C). We therefore cultured cells with 50 $\mu$ M pantoprazole and  
172 indeed saw a significant decrease in matrix mineralisation (Figs. 5D).

### 173 **Discussion**

174 In this study we report that all the PPIs tested were inhibitors of PHOSPHO1 activity whilst  
175 they had no effect on TNAP activity. The most potent inhibitor was esomeprazole which  
176 gave 50% inhibition in the sub micromolar range, followed by lansoprazole, omeprazole and  
177 pantoprazole. Consistent with this, the PPIs we tested inhibited mineralisation of bone matrix  
178 in vitro in low micromolar concentrations, except pantoprazole which did not have inhibitory  
179 effects until higher concentrations of 50 $\mu$ M were used. Conversely, we tested several H2RAs  
180 and these had no effect on PHOSPHO1 or TNAP phosphatase activity or on matrix  
181 mineralisation in vitro.

182 Several studies have shown an association with between PPIs use and fractures. Indeed, a  
183 large scale meta-analysis has reported a significant increase in relative risk (RR) of fractures  
184 at the hip [RR=1.26, 95% CI = 1.16-1.36] spine [RR=1.58, 95% CI = 1.38-1.82] and any-site  
185 fractures [RR=1.33, 95% CI = 1.15-1.54] in PPI users as compared with controls [29].

186 The PPIs reduce gastric acid secretion through inhibition of H<sup>+</sup>/K<sup>+</sup>-ATPases located in  
187 stomach parietal cells [28]. In view of this it has been speculated that calcium malabsorption  
188 mediated by neutralisation of gastric acid may cause secondary hyperparathyroidism and  
189 bone loss [6–8]. Other potential mechanisms include (i) impaired bone resorption resulting in  
190 altered bone remodelling and (ii) hypergastrinemia resulting in parathyroid hyperplasia and  
191 decreased bone mineral density [30, 31]. The H2RAs are also widely used to suppress gastric  
192 acid production in the treatment of GORD, dyspepsia and peptic ulcers these have not been  
193 associated with fractures in epidemiological studies which calls into question the hypothesis



194 that the association between fractures and PPI used is mediated by reduced calcium  
195 absorption due to achlorhydria [3, 11–15, 33]. The = data presented here is consistent with  
196 this and suggests that inhibition of PHOSPO1 may be an alternative mechanism by which  
197 PPIs, affect bone health. The PHOSPHO1 enzyme is a bone specific phosphatase that is  
198 highly expressed at sites of mineralization and essential for the formation of mechanically  
199 competent bone [17]. It is biochemically active within MVs [18] and it has been proposed  
200 that the accumulation of Pi within MVs is a consequence of PHOSPHO1s intravesicular  
201 activity and also intravesicular trafficking of TNAP-generated Pi via a Type III Na-Pi  
202 co-transporter, PiT1 [34–36]. We have previously shown that MV mineralisation is reduced  
203 in *Phospho1*<sup>-/-</sup> mice [35, 37] and that lansoprazole treatment of MVs isolated from osteoblasts  
204 impairs their mineralisation [26]. It is therefore possible that PPI inhibition of PHOSPHO1  
205 activity disrupts the biochemical machinery needed to establish the appropriate inorganic  
206 pyrophosphate to Pi ratio required to initiate the formation of HA mineral within MVs [36,  
207 38]. Our *in vitro* cell culture work is also consistent with a previous study in which  
208 lansoprazole, esomeprazole and omeprazole decreased the ability of osteoblasts to mineralise  
209 their matrix, whilst also inhibiting osteoblast gene expression [39] These observations at the  
210 cell and MV level are consistent with, and explain, the reduced bone mineral content and  
211 BMD in rodents administered omeprazole [40, 41].

212 Interestingly, the data of this present study indicated no effect of PPIs on TNAP phosphatase  
213 activity; a result that is consistent with our previous study that reported lansoprazole and  
214 other small molecule inhibitors of PHOSPHO1 had no effect on TNAP activity [18]. The  
215 importance of TNAP in the mineralisation process is well accepted [42, 43]. Indeed, in  
216 patients with hypophosphatasia and also in *Alpl*<sup>-/-</sup> mice, extravesicular crystal propagation is  
217 retarded due to an accumulation of inorganic pyrophosphate in the extracellular matrix [46].  
218 These data imply that the inhibition of osteoblast matrix mineralisation by the PPIs is via

219 their inhibition of PHOSPHO1, and not TNAP activity. A note of caution in the interpretation  
220 of these data is nevertheless warranted; other *in vitro* studies have reported that lansoprazole  
221 can inhibit porcine TNAP activity albeit with a  $K_i$  value of ~100 times higher than that  
222 reported for the inhibition of recombinant human PHOSPHO1 with lansoprazole [18, 50]. An  
223 explanation for these different results is unclear.

224 The order of potency (based on our  $IC_{50}$  data) of PPI inhibition of PHOSPHO1 activity is  
225 esomeprazole > omeprazole = lansoprazole > pantoprazole (Fig. 2), which precisely mimics  
226 our data in mineralising primary osteoblasts, but also their ability (based on omeprazole  
227 equivalents) to inhibit acid production [51, 52]. Intriguingly, this suggests that the structure of  
228 the more potent acid suppressive PPIs accounts for their PHOSPHO1 inhibitory properties.  
229 Also, pantoprazole, the PPI least able to inhibit PHOSPHO1 enzyme activity was also a poor  
230 inhibitor of matrix mineralisation. Knowing the molecular model of PHOSPHO1 [21], it  
231 would be of interest to perform ligand docking studies to gain more information as to how the  
232 different PPIs associate with the enzyme and temper its biological activity. This has the  
233 potential to equip industry with the knowledge to generate modified and improved PPIs  
234 without the undesired off target bone effects.

235 In summary we have shown that commonly prescribed PPIs, but not H2RAs, inhibit the  
236 activity of the bone specific phosphatase, PHOSPHO1 *in vitro* in a dose-dependent manner  
237 and at concentrations that are similar to those used clinically. We have also shown that  
238 different PPIs differ by more than 25-fold in their ability to inhibit PHOSPHO1 activity  
239 compared with a 7-fold difference in potency for inhibition of acid production [51]. This  
240 indicates that there is a >3-fold difference in the ability of PPIs to inhibit PHOSPHO1  
241 activity as compared with their ability to suppress gastric acid production.

242 In view of the fact that PHOSPHO1 plays a critical role in bone mineralisation, we  
243 hypothesise that the association between PPI use and bone fractures is possibly due to their

244 inhibitory effect on PHOSPHO1 activity. While this remains to be confirmed by further  
245 research it could have clinical implications in allowing clinicians to select PPI's with the least  
246 inhibitory effect on PHOSPHO1 activity as the preferred drug in this class in patients at high  
247 risk of fragility fractures.

#### 248 **Funding**

249 We are grateful to Medical Research Scotland for a Vacation Scholarship (KM) and the  
250 Society for Endocrinology for a Summer Studentship (KL). We are also grateful to the  
251 Biotechnology and Biological Sciences Research Council (BBSRC) for Institute Strategic  
252 Programme Grant Funding BB/J004316/1.

#### 253 **Conflicts of interest**

254 The authors have no conflicts of interest

#### 255 **Availability of data**

256 Data are available on reasonable request from the corresponding authors.

#### 257 **Authors contributions**

258 Conception and design of the study: KS, SR, CF. Acquisition of data: KS, KM, KL.  
259 Interpretation of data: KS, CF. Drafting the manuscript: KS, CF. Revising the manuscript and  
260 final approval, and agreement to be accountable for all aspects of the work: all authors.

#### 261 **Ethics approval**

262 All experimental protocols were approved by Roslin Institute's Animal Users Committee and  
263 the animals were maintained in accordance with UK Home Office guidelines for the care and  
264 use of laboratory animals.

#### 265 **References**

- 266 1. Hollingworth S, Duncan EL, Martin JH (2010) Marked increase in proton pump  
267 inhibitors use in Australia. *Pharmacoepidemiology and Drug Safety* 19:1019–1024.  
268 <https://doi.org/10.1002/pds.1969>
- 269 2. Prescription Cost Analysis - NHS Digital. [https://digital.nhs.uk/data-and-](https://digital.nhs.uk/data-and-information/publications/statistical/prescription-cost-analysis)  
270 [information/publications/statistical/prescription-cost-analysis](https://digital.nhs.uk/data-and-information/publications/statistical/prescription-cost-analysis). Accessed 12 Mar 2021
- 271 3. Vestergaard P, Rejnmark L, Mosekilde L (2006) Proton pump inhibitors, histamine  
272 H2 receptor antagonists, and other antacid medications and the risk of fracture.  
273 *Calcified Tissue International* 79:76–83. <https://doi.org/10.1007/s00223-006-0021-7>
- 274 4. Targownik LE, Lix LM, Metge CJ, et al (2008) Use of proton pump inhibitors and  
275 risk of osteoporosis-related fractures. *CMAJ* 179:319–326.  
276 <https://doi.org/10.1503/cmaj.071330>
- 277 5. Yang YX, Lewis JD, Epstein S, Metz DC (2006) Long-term proton pump inhibitor  
278 therapy and risk of hip fracture. *Journal of the American Medical Association*  
279 296:2947–2953. <https://doi.org/10.1001/jama.296.24.2947>
- 280 6. Hardy P, Sechet A, Hottelart C, et al (1998) Inhibition of gastric secretion by  
281 omeprazole and efficiency of calcium carbonate on the control of hyperphosphatemia  
282 in patients on chronic hemodialysis. *Artificial Organs* 22:569–573.  
283 <https://doi.org/10.1046/j.1525-1594.1998.06200.x>
- 284 7. Insogna KL (2009) The effect of proton pump-inhibiting drugs on mineral  
285 metabolism. *American Journal of Gastroenterology* 104
- 286 8. O’Connell MB, Madden DM, Murray AM, et al (2005) Effects of proton pump  
287 inhibitors on calcium carbonate absorption in women: A randomized crossover trial.  
288 *American Journal of Medicine* 118:778–781.  
289 <https://doi.org/10.1016/j.amjmed.2005.02.007>

- 290 9. Hansen KE, Jones AN, Lindstrom MJ, et al (2010) Do proton pump inhibitors  
291 decrease calcium absorption? *Journal of Bone and Mineral Research* 25:2786–2795.  
292 <https://doi.org/10.1002/jbmr.166>
- 293 10. Serfaty-Lacrosniere C, Wood RJ, Voytko D, et al (1995) Hypochlorhydria From  
294 Short-Term Omeprazole Treatment Does Not Inhibit Intestinal Absorption Of  
295 Calcium, Phosphorus, Magnesium Or Zinc From Food In Humans. *Journal of the*  
296 *American College of Nutrition* 14:364–368.  
297 <https://doi.org/10.1080/07315724.1995.10718522>
- 298 11. de Vries F, Cooper AL, Cockle SM, et al (2009) Fracture risk in patients receiving  
299 acid-suppressant medication alone and in combination with bisphosphonates.  
300 *Osteoporosis International* 20:1989–1998. <https://doi.org/10.1007/s00198-009-0891-4>
- 301 12. Yu EW, Blackwell T, Ensrud KE, et al (2008) Acid-suppressive medications and risk  
302 of bone loss and fracture in older adults. *Calcified Tissue International* 83:251–259.  
303 <https://doi.org/10.1007/s00223-008-9170-1>
- 304 13. Gray SL, Lacroix AZ, Larson J, et al (2010) Proton pump inhibitor use, hip fracture,  
305 and change in bone mineral density in postmenopausal women: Results from the  
306 women’s health initiative. *Archives of Internal Medicine* 170:765–771.  
307 <https://doi.org/10.1001/archinternmed.2010.94>
- 308 14. Park JH, Lee J, Yu SY, et al (2020) Comparing proton pump inhibitors with  
309 histamin-2 receptor blockers regarding the risk of osteoporotic fractures: a nested case-  
310 control study of more than 350,000 Korean patients with GERD and peptic ulcer  
311 disease. *BMC Geriatrics* 20:407. <https://doi.org/10.1186/s12877-020-01794-3>
- 312 15. Lyu B, Hansen KE, Jorgenson MR, Astor BC (2020) Associations between Proton  
313 Pump Inhibitor and Histamine-2 Receptor Antagonist and Bone Mineral Density

- 314 among Kidney Transplant Recipients. *American Journal of Nephrology* 51:433–441.  
315 <https://doi.org/10.1159/000507470>
- 316 16. Poly TN, Islam MM, Yang HC, et al (2019) Proton pump inhibitors and risk of hip  
317 fracture: a meta-analysis of observational studies. *Osteoporosis International* 30:103–  
318 114. <https://doi.org/10.1007/s00198-018-4788-y>
- 319 17. Dillon S, Staines KA, Millán JL, Farquharson C (2019) How To Build a Bone:  
320 PHOSPHO1, Biomineralization, and Beyond. *JBMR Plus* 3:e10202.  
321 <https://doi.org/10.1002/jbm4.10202>
- 322 18. Roberts S, Narisawa S, Harmey D, et al (2007) Functional Involvement of  
323 PHOSPHO1 in Matrix Vesicle-Mediated Skeletal Mineralization. *Journal of Bone and*  
324 *Mineral Research* 22:617–627. <https://doi.org/10.1359/jbmr.070108>
- 325 19. Stewart AJ, Roberts SJ, Seawright E, et al (2006) The presence of PHOSPHO1 in  
326 matrix vesicles and its developmental expression prior to skeletal mineralization. *Bone*  
327 39:1000–1007. <https://doi.org/10.1016/j.bone.2006.05.014>
- 328 20. Houston B, Stewart AJ, Farquharson C (2004) PHOSPHO1 - A novel phosphatase  
329 specifically expressed at sites of mineralisation in bone and cartilage. *Bone* 34:629–  
330 637. <https://doi.org/10.1016/j.bone.2003.12.023>
- 331 21. Stewart AJ, Schmid R, Blindauer CA, et al (2003) Comparative modelling of human  
332 PHOSPHO1 reveals a new group of phosphatases within the haloacid dehalogenase  
333 superfamily. *Protein Engineering* 16:889–895. <https://doi.org/10.1093/protein/gzg126>
- 334 22. Houston B, Seawright E, Jefferies D, et al (1999) Identification and cloning of a  
335 novel phosphatase expressed at high levels in differentiating growth plate  
336 chondrocytes1. *Biochimica et Biophysica Acta - Molecular Cell Research* 1448:500–  
337 506. [https://doi.org/10.1016/S0167-4889\(98\)00153-0](https://doi.org/10.1016/S0167-4889(98)00153-0)

- 338 23. Yadav MC, Simão AMS, Narisawa S, et al (2011) Loss of skeletal mineralization by  
339 the simultaneous ablation of PHOSPHO1 and alkaline phosphatase function: A unified  
340 model of the mechanisms of initiation of skeletal calcification. *Journal of Bone and*  
341 *Mineral Research* 26:286–297. <https://doi.org/10.1002/jbmr.195>
- 342 24. Huesa C, Houston D, Kiffer-Moreira T, et al (2015) The functional co-operativity of  
343 tissue-nonspecific alkaline phosphatase (TNAP) and PHOSPHO1 during initiation of  
344 skeletal mineralization. *Biochemistry and Biophysics Reports* 4:196–201.  
345 <https://doi.org/10.1016/j.bbrep.2015.09.013>
- 346 25. Javaheri B, Carriero A, Staines KA, et al (2015) Phospho1 deficiency transiently  
347 modifies bone architecture yet produces consistent modification in osteocyte  
348 differentiation and vascular porosity with ageing. *Bone* 81:277–291.  
349 <https://doi.org/10.1016/j.bone.2015.07.035>
- 350 26. MacRae VE, Davey MG, McTeir L, et al (2010) Inhibition of PHOSPHO1 activity  
351 results in impaired skeletal mineralization during limb development of the chick. *Bone*  
352 46:1146–1155. <https://doi.org/10.1016/j.bone.2009.12.018>
- 353 27. Roberts SJ, Stewart AJ, Sadler PJ, Farquharson C (2004) Human PHOSPHO1  
354 exhibits high specific phosphoethanolamine and phosphocholine phosphatase  
355 activities. *Biochemical Journal* 382:59–65. <https://doi.org/10.1042/BJ20040511>
- 356 28. Sachs G, Shin JM, Hunt R (2010) Novel approaches to inhibition of gastric acid  
357 secretion. *Current Gastroenterology Reports* 12:437–447
- 358 29. Zhou B, Huang Y, Li H, et al (2016) Proton-pump inhibitors and risk of fractures: an  
359 update meta-analysis. *Osteoporosis International* 27:339–347.  
360 <https://doi.org/10.1007/s00198-015-3365-x>

- 361 30. Mizunashi K, Furukawa Y, Katano K, Abe K (1993) Effect of omeprazole, an  
362 inhibitor of H<sup>+</sup>, K<sup>+</sup>-ATPase, on bone resorption in humans. *Calcified Tissue*  
363 *International* 53:21–25. <https://doi.org/10.1007/BF01352010>
- 364 31. Gagnemo-Persson R, Samuelsson A, Håkanson R, Persson P (1997) Chicken  
365 parathyroid hormone gene expression in response to gastrin, omeprazole,  
366 ergocalciferol, and restricted food intake. *Calcified Tissue International* 61:210–215.  
367 <https://doi.org/10.1007/s002239900325>
- 368 32. Chiba N, de Gara CJ, Wilkinson JM, Hunt RH (1997) Speed of healing and symptom  
369 relief in grade II to IV gastroesophageal reflux disease: A meta-analysis.  
370 *Gastroenterology* 112:1798–1810. <https://doi.org/10.1053/gast.1997.v112.pm9178669>
- 371 33. Park JH, Lee J, Yu SY, et al (2020) Comparing proton pump inhibitors with  
372 histamin-2 receptor blockers regarding the risk of osteoporotic fractures: a nested case-  
373 control study of more than 350,000 Korean patients with GERD and peptic ulcer  
374 disease. *BMC Geriatrics* 20:407. <https://doi.org/10.1186/s12877-020-01794-3>
- 375 34. Ciancaglini P, Yadav MC, Sper Simão AM, et al (2009) Kinetic Analysis of  
376 Substrate Utilization by Native and TNAP-, NPP1- or PHOSPHO1-Deficient Matrix  
377 Vesicles. *Journal of Bone and Mineral Research* 25:091029140456050–37.  
378 <https://doi.org/10.1359/jbmr.091023>
- 379 35. Yadav MC, Bottini M, Cory E, et al (2016) Skeletal Mineralization Deficits and  
380 Impaired Biogenesis and Function of Chondrocyte-Derived Matrix Vesicles in  
381 *Phospho1*<sup>-/-</sup> and *Phospho1/P<sub>i</sub> t1* Double-Knockout Mice. *Journal of Bone and*  
382 *Mineral Research* 31:1275–1286. <https://doi.org/10.1002/jbmr.2790>
- 383 36. Millán JL (2013) The role of phosphatases in the initiation of skeletal mineralization.  
384 *Calcified Tissue International* 93:299–306. <https://doi.org/10.1007/s00223-012-9672-8>



- 385 37. McKee MD, Yadav MC, Foster BL, et al (2013) Compounded PHOSPHO1/ALPL  
386 deficiencies reduce dentin mineralization. *Journal of Dental Research* 92:721–727.  
387 <https://doi.org/10.1177/0022034513490958>
- 388 38. Cui L, Houston DA, Farquharson C, MacRae VE (2016) Characterisation of matrix  
389 vesicles in skeletal and soft tissue mineralisation. *Bone* 87:147–158
- 390 39. Costa-Rodrigues J, Reis S, Teixeira S, et al (2013) Dose-dependent inhibitory effects  
391 of proton pump inhibitors on human osteoclastic and osteoblastic cell activity. *FEBS*  
392 *Journal* 280:5052–5064. <https://doi.org/10.1111/febs.12478>
- 393 40. Cui GL, Syversen U, Zhao CM, et al (2001) Long-term omeprazole treatment  
394 suppresses body weight gain and bone mineralization in young male rats. *Scandinavian*  
395 *Journal of Gastroenterology* 36:1011–1015.  
396 <https://doi.org/10.1080/003655201750422585>
- 397 41. Yanagihara GR, de Paiva AG, Neto MP, et al (2015) Effects of long-term  
398 administration of omeprazole on bone mineral density and the mechanical properties  
399 of the bone. *Revista Brasileira de Ortopedia (English Edition)* 50:232–238.  
400 <https://doi.org/10.1016/j.rboe.2015.03.002>
- 401 42. Anderson HC (2003) Matrix vesicles and calcification. *Current rheumatology reports*  
402 5:222–226
- 403 43. Robison R (1923) The Possible Significance of Hexosephosphoric Esters in  
404 Ossification. *Biochemical Journal* 17:286–293. <https://doi.org/10.1042/bj0170286>
- 405 44. Majeska RJ, Wuthier RE (1975) Studies on matrix vesicles isolated from chick  
406 epiphyseal cartilage Association of pyrophosphatase and ATPase activities with  
407 alkaline phosphatase. *BBA - Enzymology* 391:51–60. [https://doi.org/10.1016/0005-](https://doi.org/10.1016/0005-2744(75)90151-5)  
408 [2744\(75\)90151-5](https://doi.org/10.1016/0005-2744(75)90151-5)

- 409 45. Meyer JL (1984) Can biological calcification occur in the presence of  
410 pyrophosphate? *Archives of Biochemistry and Biophysics* 231:1–8.  
411 [https://doi.org/10.1016/0003-9861\(84\)90356-4](https://doi.org/10.1016/0003-9861(84)90356-4)
- 412 46. Anderson HC, Sipe JB, Hessle L, et al (2004) Impaired Calcification Around Matrix  
413 Vesicles of Growth Plate and Bone in Alkaline Phosphatase-Deficient Mice. *American*  
414 *Journal of Pathology* 164:841–847. [https://doi.org/10.1016/S0002-9440\(10\)63172-0](https://doi.org/10.1016/S0002-9440(10)63172-0)
- 415 47. Hsu HHT (1992) Further studies on ATP-mediated CA deposition by isolated matrix  
416 vesicles. *Bone and Mineral* 17:279–283. [https://doi.org/10.1016/0169-6009\(92\)90751-](https://doi.org/10.1016/0169-6009(92)90751-X)  
417 X
- 418 48. Anderson HC, Reynolds JJ (1973) Pyrophosphate stimulation of calcium uptake into  
419 cultured embryonic bones. Fine structure of matrix vesicles and their role in  
420 calcification. *Developmental Biology* 34:211–227. [https://doi.org/10.1016/0012-](https://doi.org/10.1016/0012-1606(73)90351-5)  
421 1606(73)90351-5
- 422 49. Anderson HC (2003) Matrix vesicles and calcification. *Current rheumatology reports*  
423 5:222–226
- 424 50. Delomenède M, Buchet R, Mebarek S (2009) Lansoprazole is an uncompetitive  
425 inhibitor of tissue-nonspecific alkaline phosphatase
- 426 51. Kirchheiner J, Glatt S, Fuhr U, et al (2009) Relative potency of proton-pump  
427 inhibitors - Comparison of effects on intragastric pH. *European Journal of Clinical*  
428 *Pharmacology* 65:19–31
- 429 52. Graham DY, Tansel A (2018) Interchangeable Use of Proton Pump Inhibitors Based  
430 on Relative Potency. *Clinical Gastroenterology and Hepatology* 16:800-808.e7.  
431 <https://doi.org/10.1016/j.cgh.2017.09.033>

432

433 **Figure Legends**

434 **Figure 1.** The effects of proton pump inhibitors (PPIs) on PHOSPHO1 activity. PHOSPHO1  
435 activity was assessed by phosphatase assays in the presence of (A) lansoprazole (B)  
436 omeprazole (C) esomeprazole (D) pantoprazole.

437 **Figure 2.** The effects of histamine-2 receptor antagonists (H2RAs) on PHOSPHO1 activity.  
438 PHOSPHO1 activity was assessed by phosphatase assays in the presence of (A) cimetidine  
439 (B) ranitidine (C) famitidine (D) nizatidine.

440 **Figure 3.** The effects of proton pump inhibitors (PPIs) on TNAP activity. TNAP activity was  
441 assessed by phosphatase assays in the presence of the PPIs (A) lansoprazole (B) omeprazole  
442 (C) esomeprazole (D) pantoprazole

443 **Figure 4.** The effects of histamine-2 receptor antagonists (H2RAs) on TNAP activity. TNAP  
444 activity was assessed by phosphatase assays in the presence of the H2RAs (A) cimetidine (B)  
445 ranitidine (C) famitidine (D) nizatidine.

446 **Figure 5.** The effects of proton pump inhibitors (PPIs) on primary osteoblast matrix  
447 mineralisation. Primary osteoblasts were cultured for 28 days in the presence of 0-10 $\mu$ M  
448 lansoprazole, omeprazole, esomeprazole and pantoprazole. (A) Microscopic images of  
449 alizarin red stained mineral associated with nodule formation (B) Alizarin red staining (C)  
450 Quantification of alizarin red staining (D) Alizarin red staining of primary osteoblasts treated  
451 with 50 $\mu$ M pantoprazole. Data are represented as mean  $\pm$  S.E.M. (n=3 wells/treatment)  
452 P<0.05\*, P<0.01\*\*, P<0.001\*\*\*.

**A**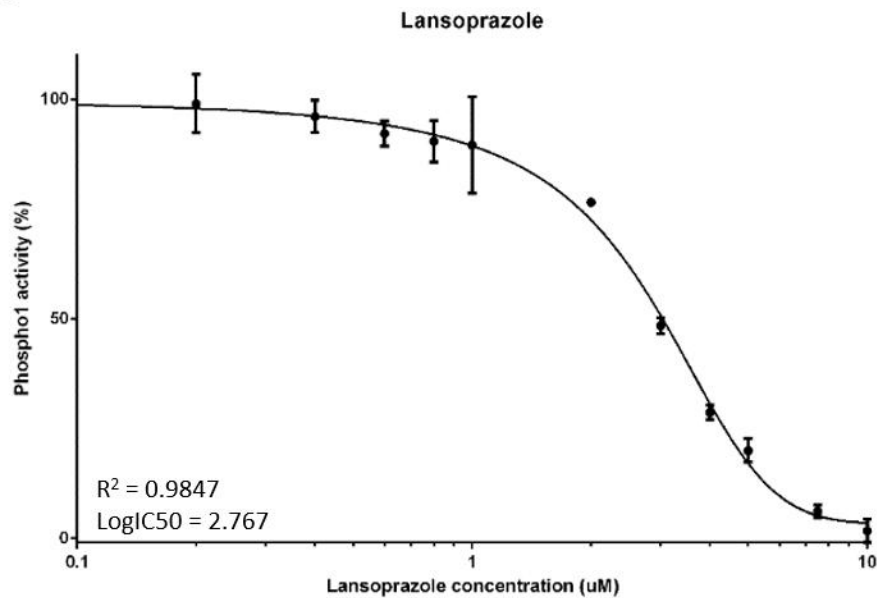**B**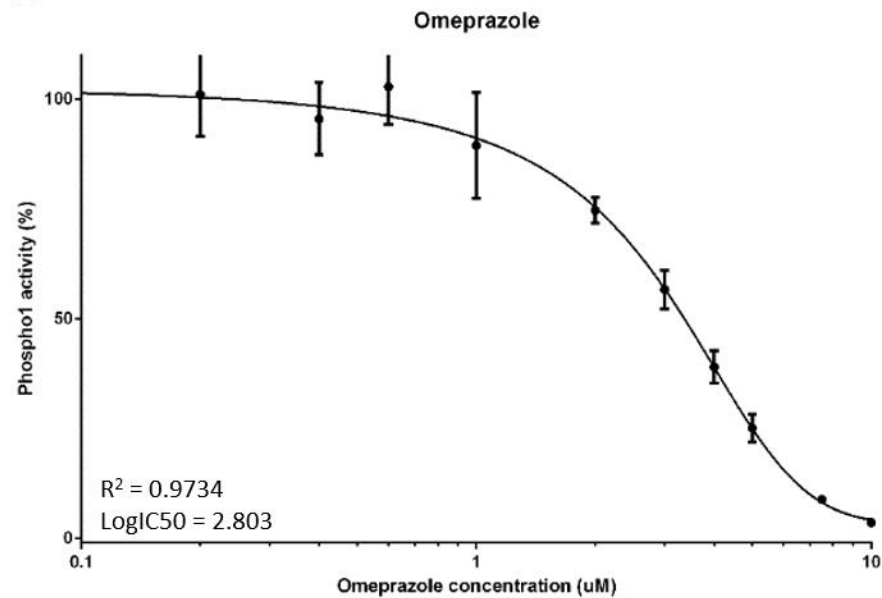**C**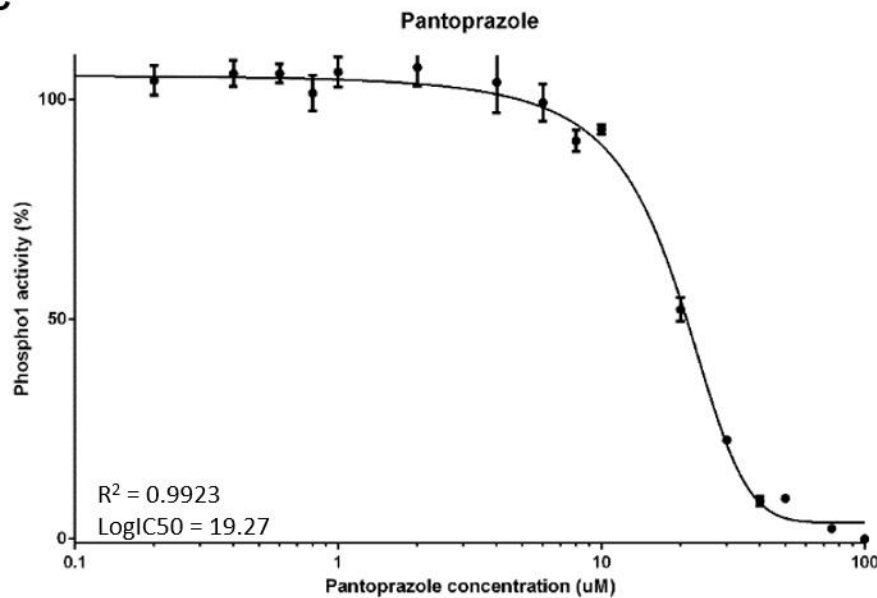**D**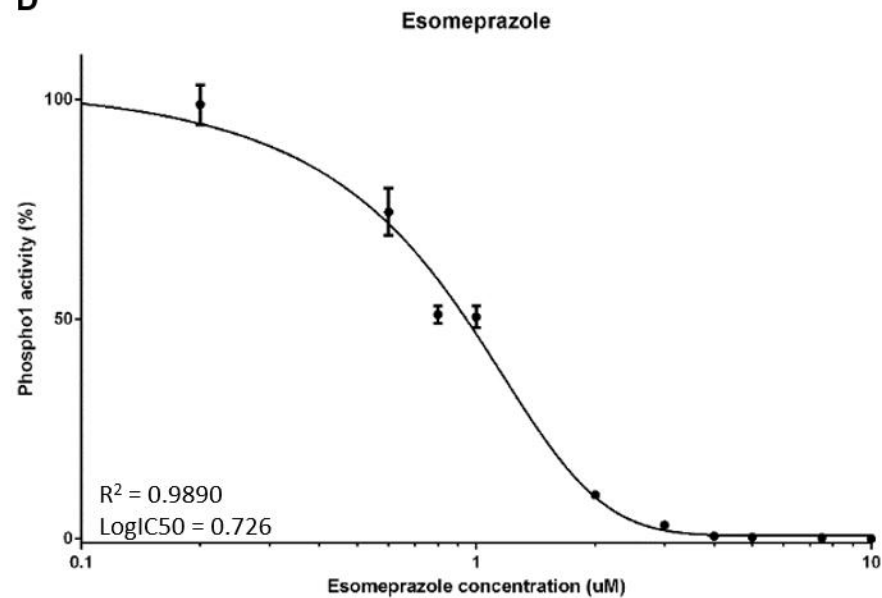

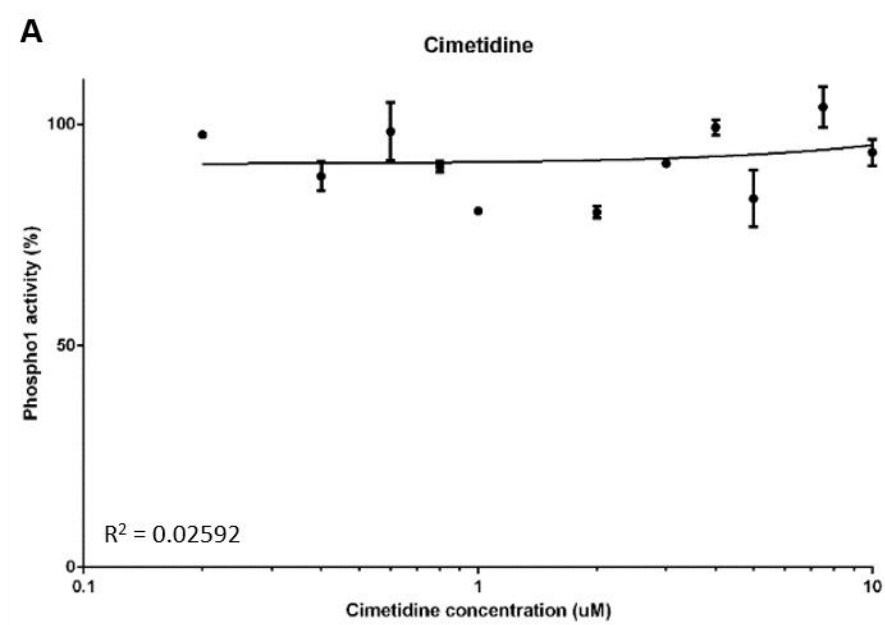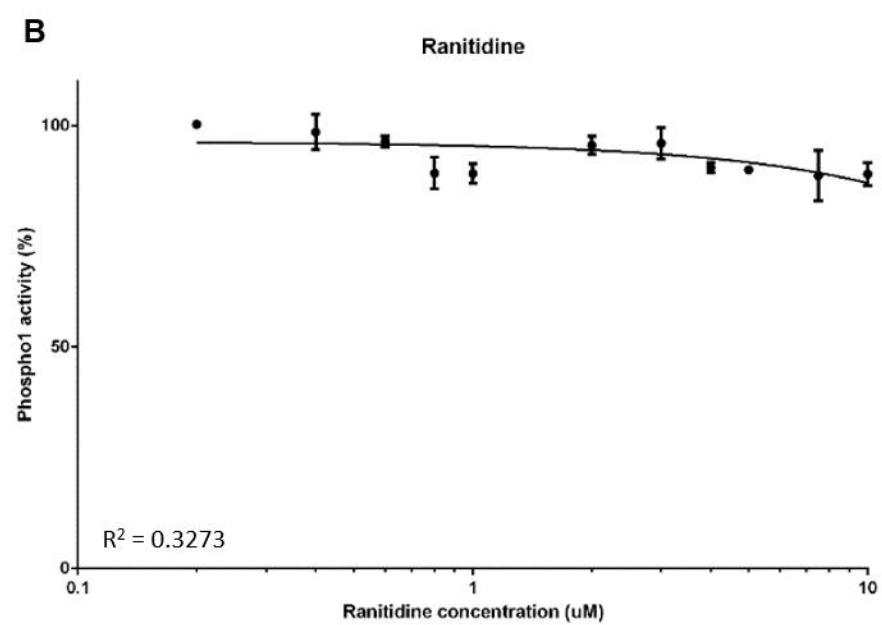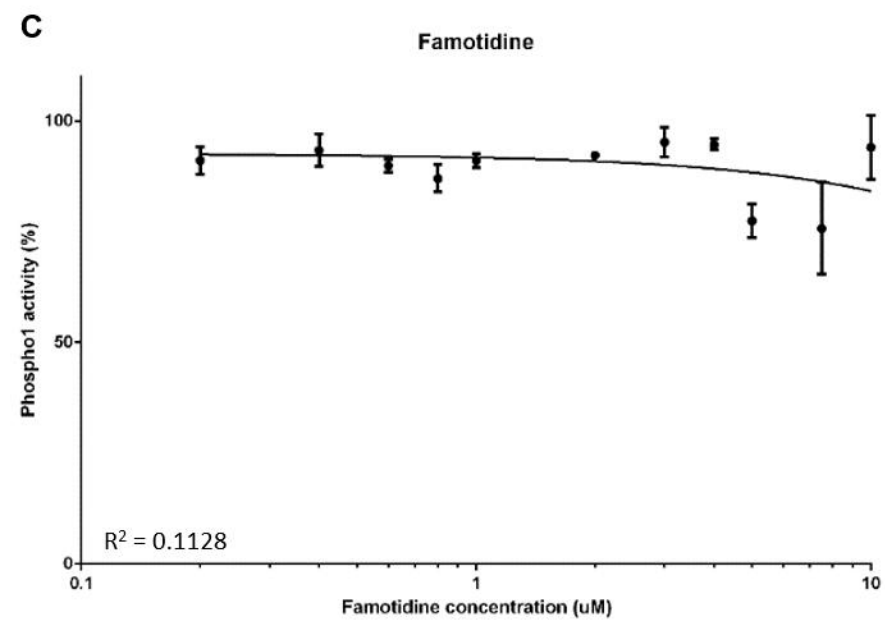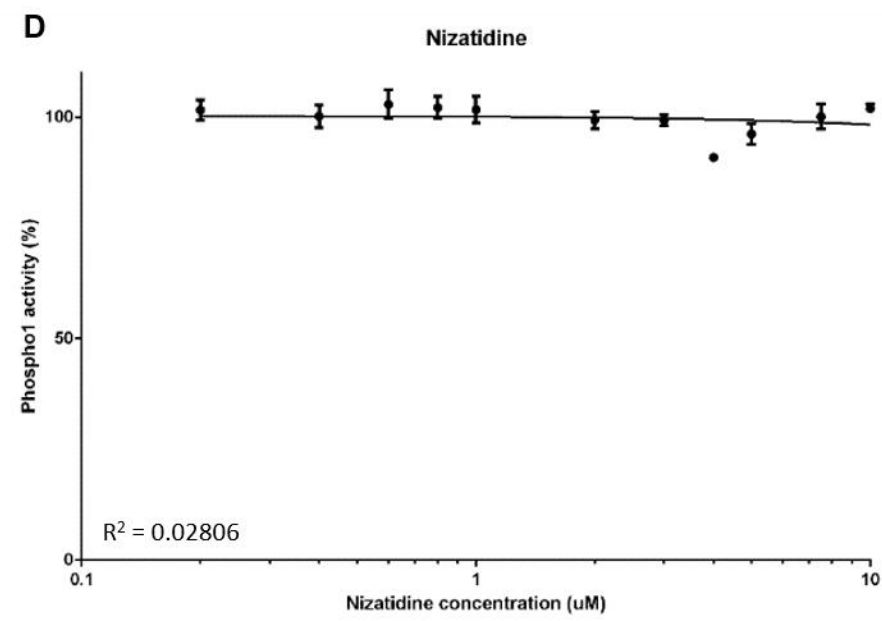

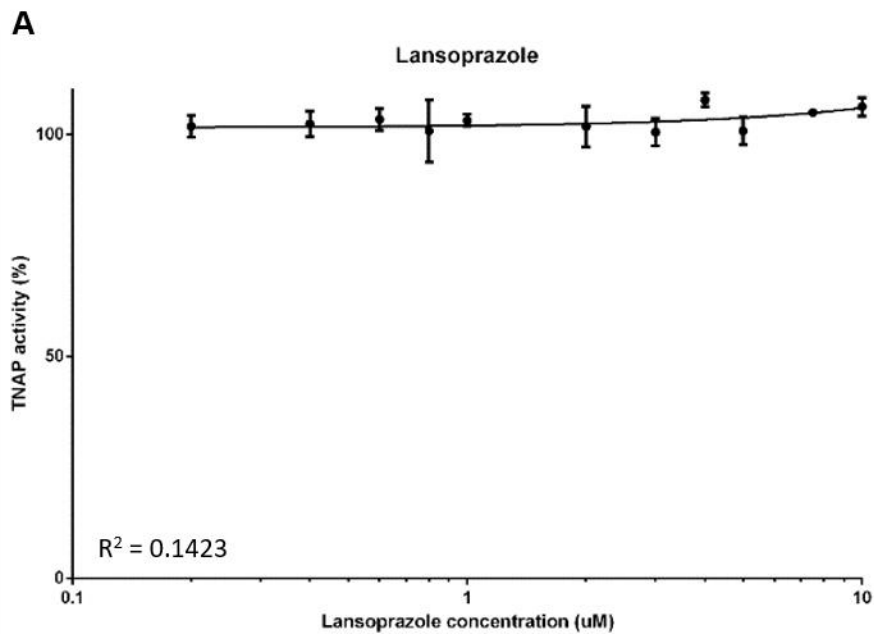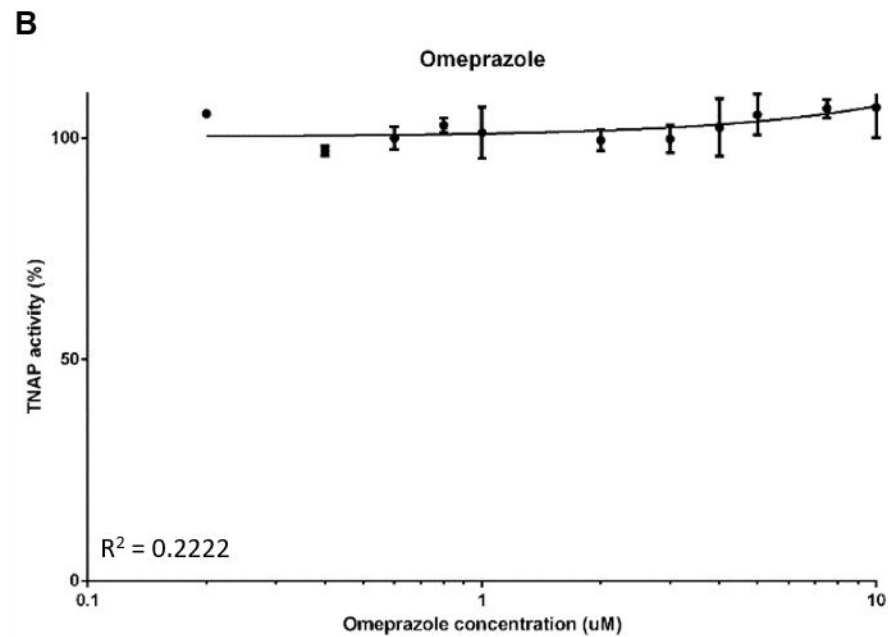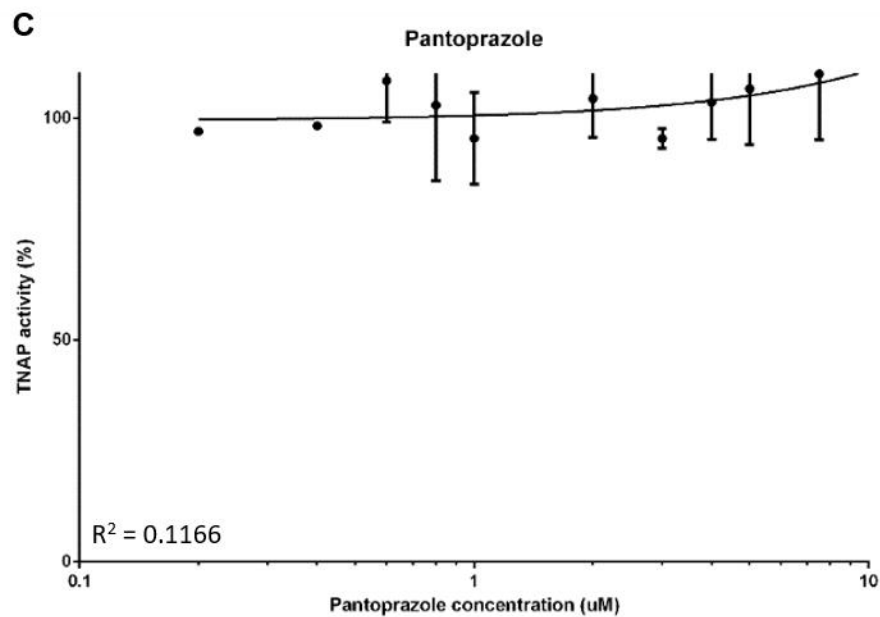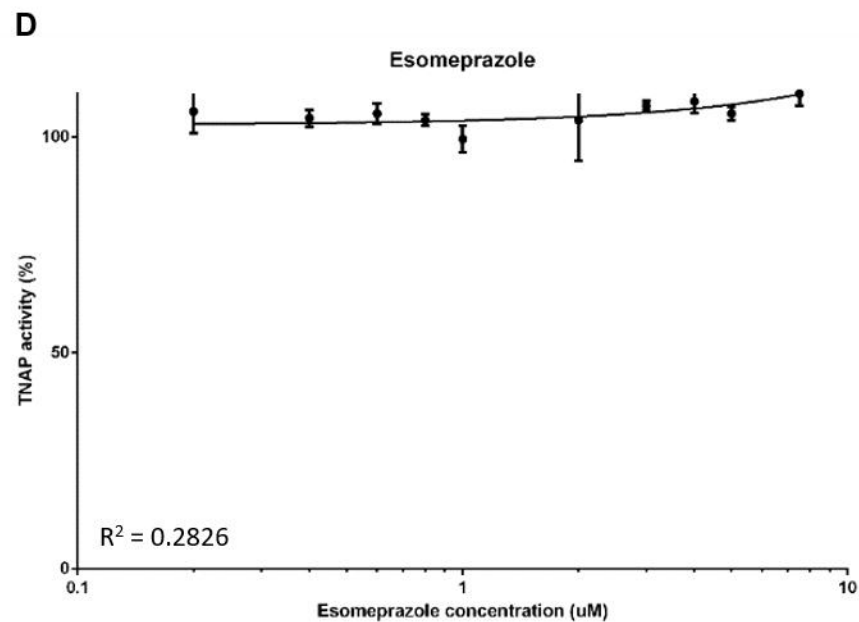

**A**

Cimetidine

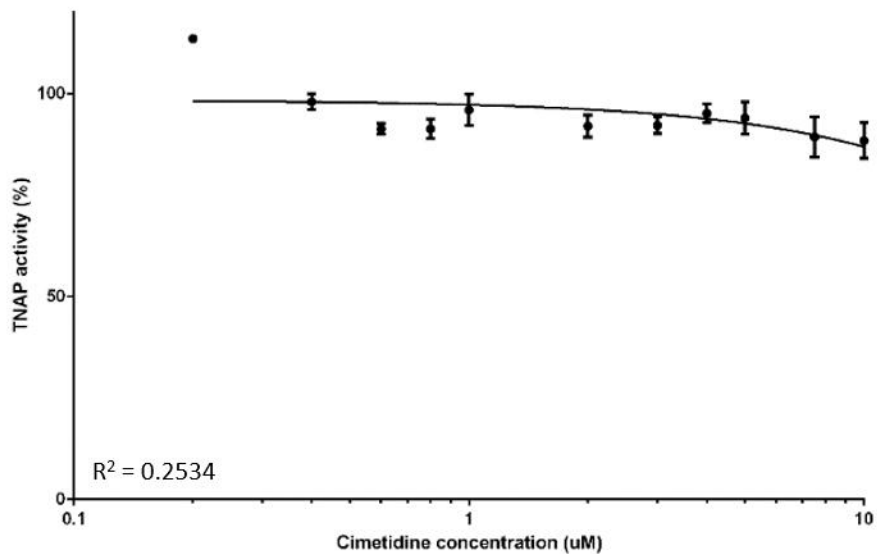**B**

Ranitidine

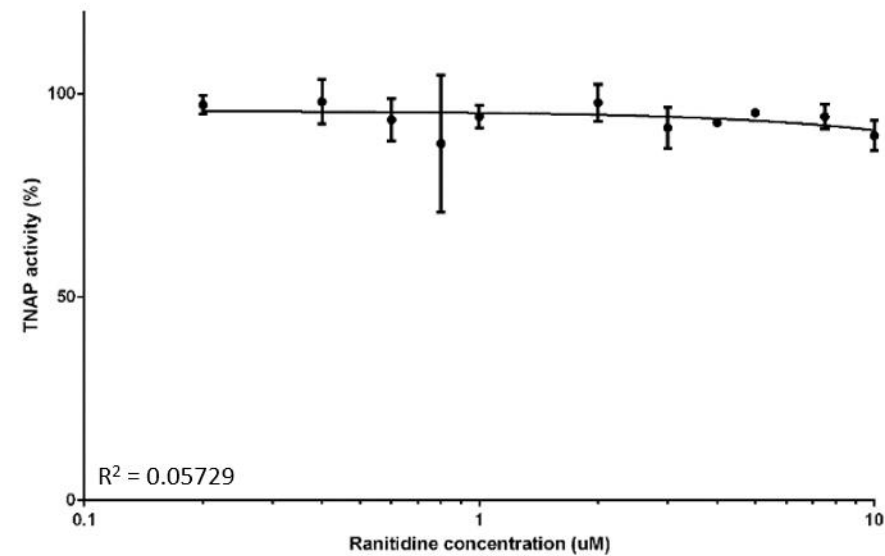**C**

Famotidine

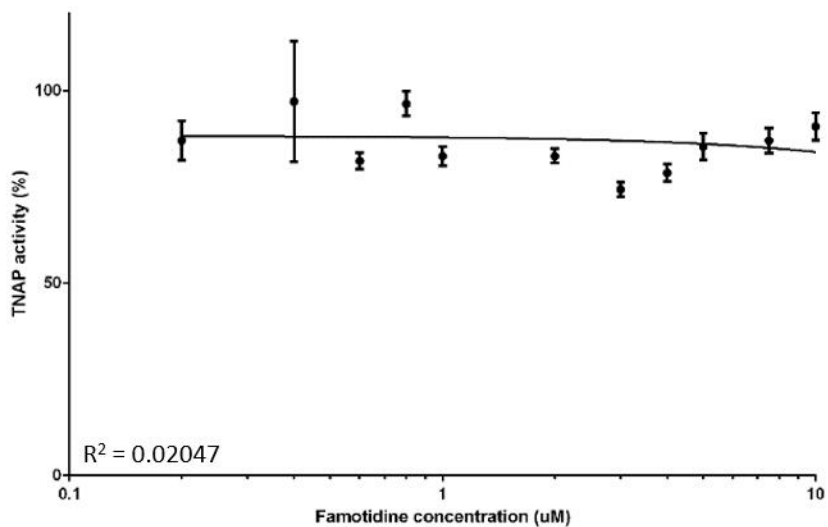**D**

Nizatidine

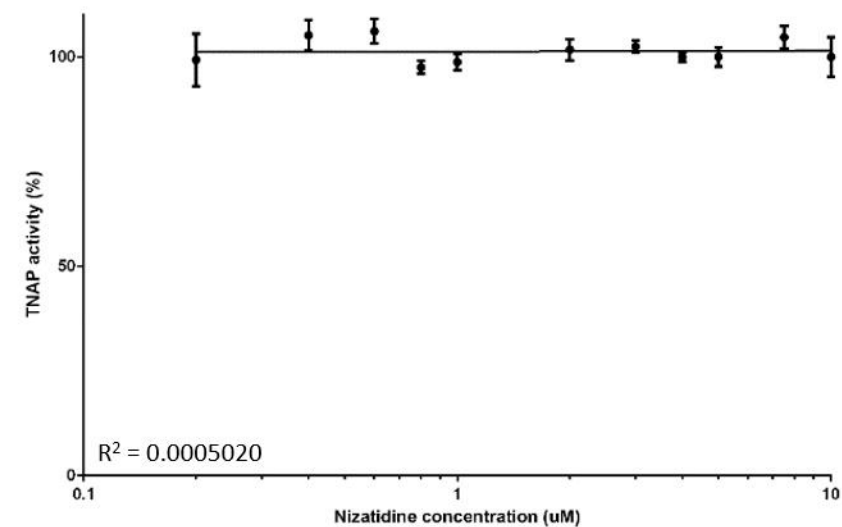



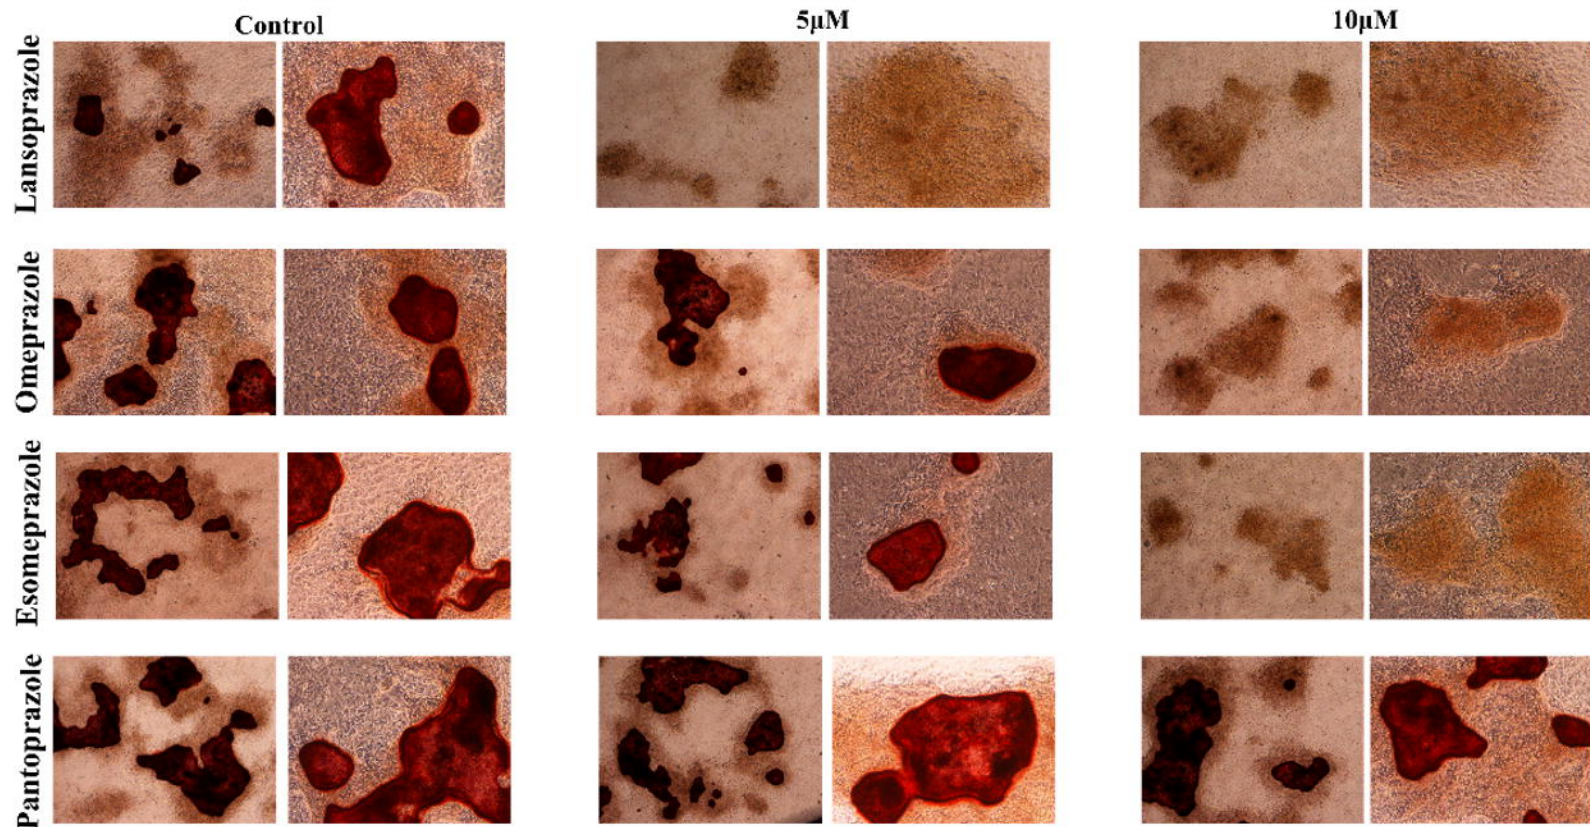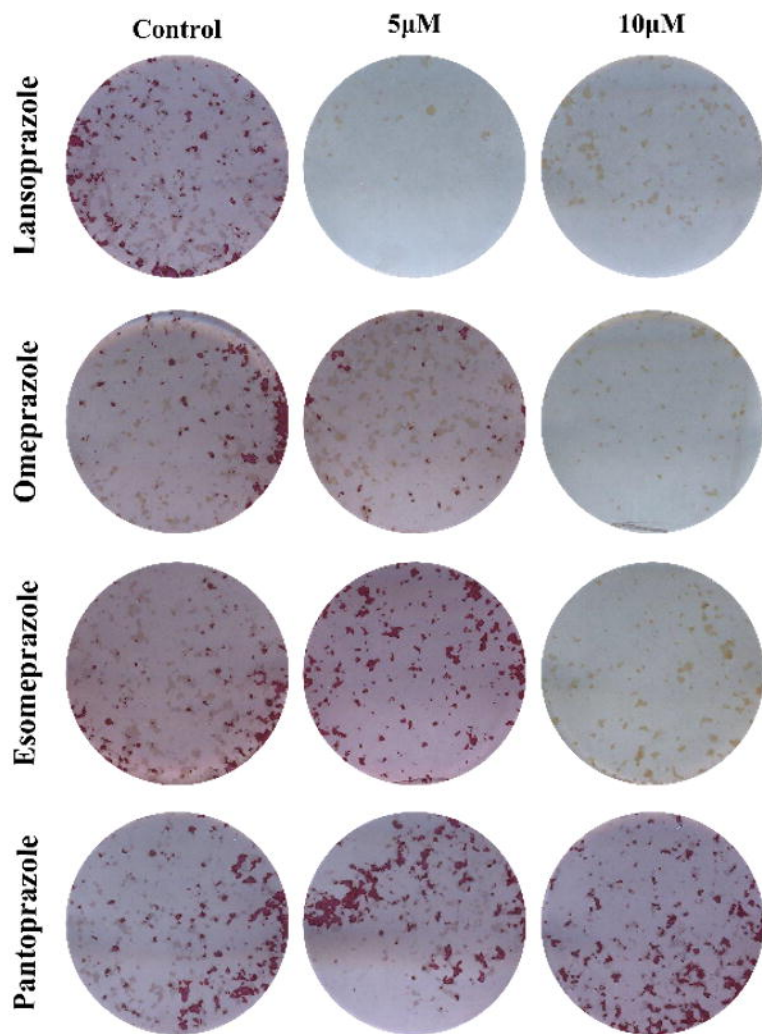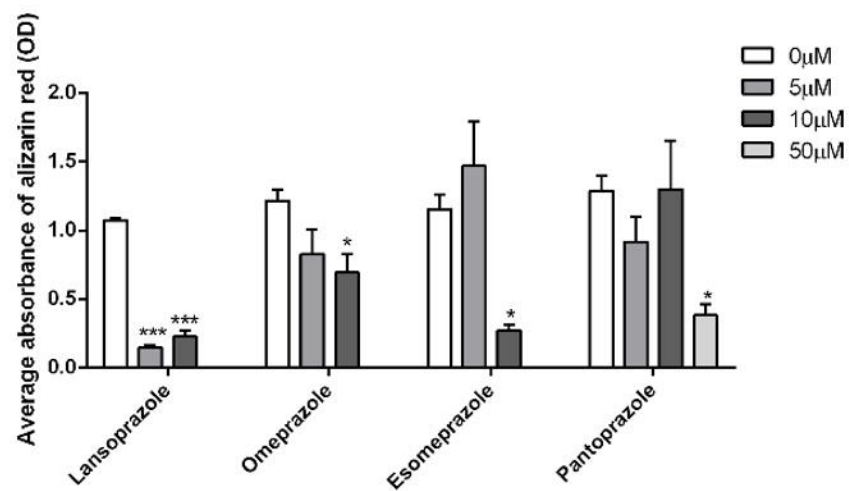

**50µM Pantoprazole**

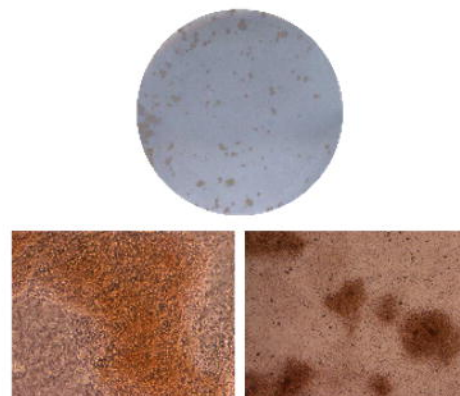

Source: http://biorxiv.org/content/10.1101/2021.04.29.441931v1.full.pdf
